# Supplementary material
Source: publisher figshare collection journal article supplement (https://frontiersin.figshare.com/ndownloader/files/14520824)

**Supplementary Material S5:** (A) Original background Raman spectrum and (B) baseline background correction/smoothing SG3 of microparticle samples.


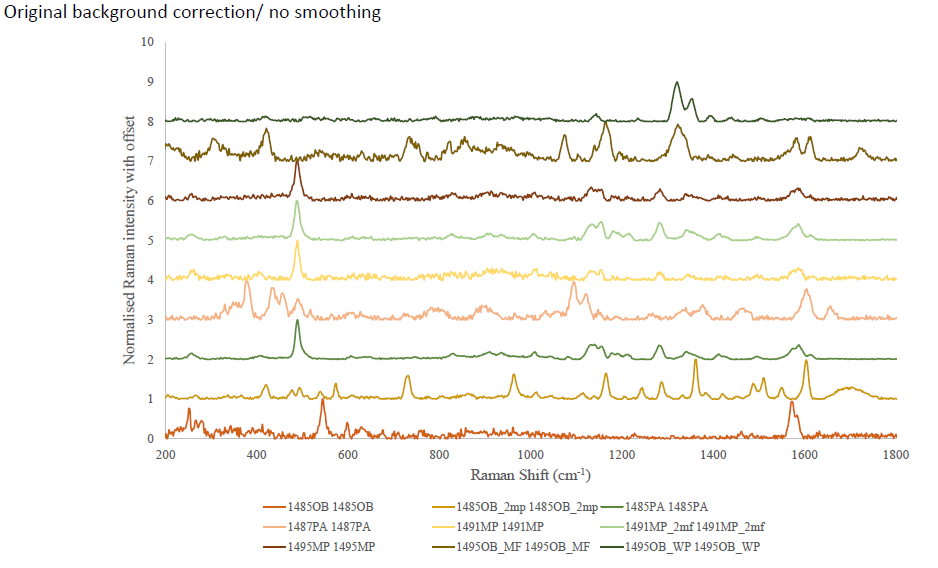

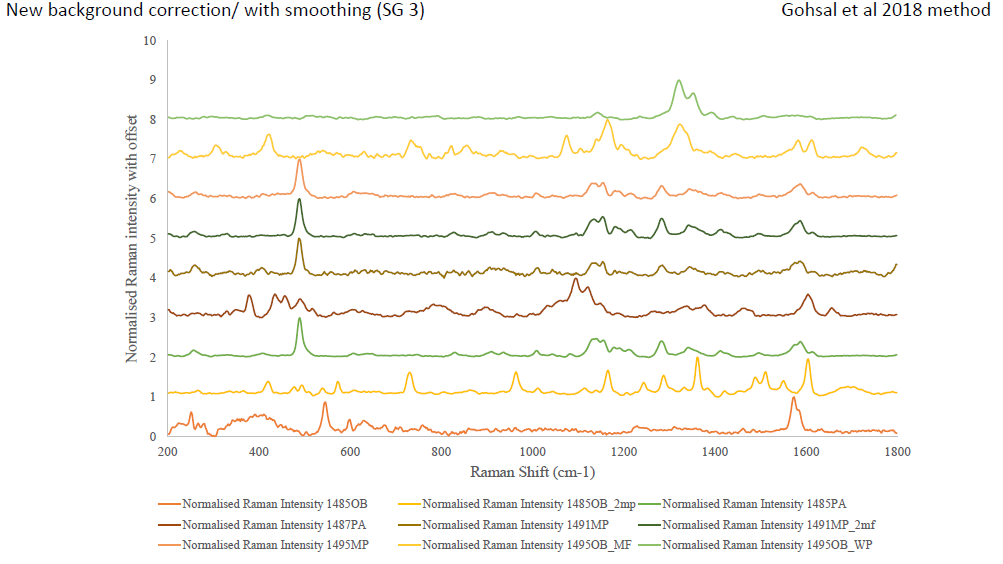

Supplement: Supplementary file 1 [file 14520824]
